# Supplementary material for: Microwave synthesised Pd–TiO2 for photocatalytic ammonia production
Source: PubMed Central journal article supplement (PMC9060955; doi:10.1039/c8ra09762c), 2019-02-22
Supplement: RA-009-C8RA09762C-s001.pdf [file RA-009-C8RA09762C-s001.pdf]

## Supplementary Information

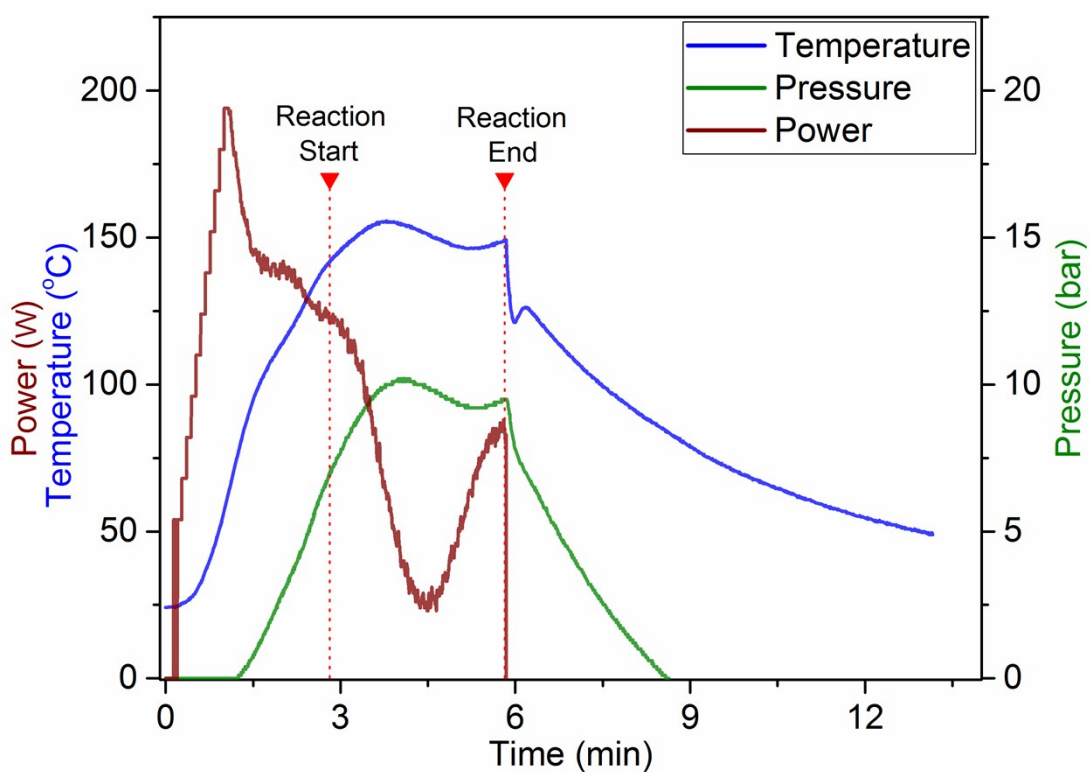

**Figure S1.** Graph showing experimental data of pressure, temperature and power during the microwave synthesis of 3.97wt% Pd-TiO<sub>2</sub>

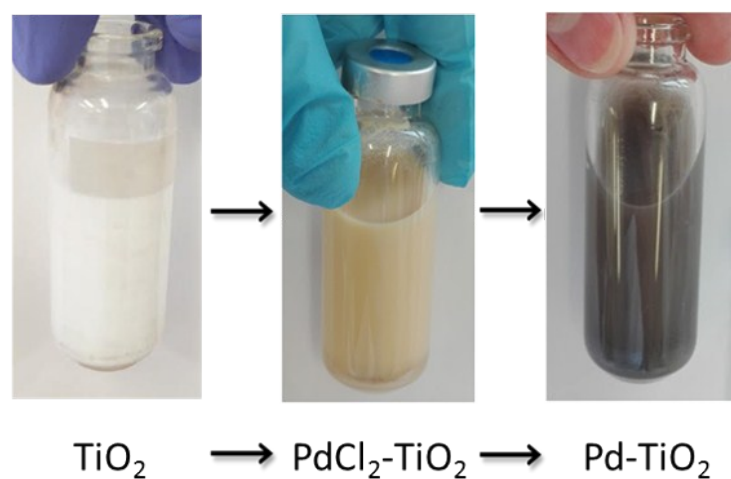

**Figure S2.** Pictures showing colour changes of nanopowder suspensions after the addition of Pd precursor and after the microwave synthesis.

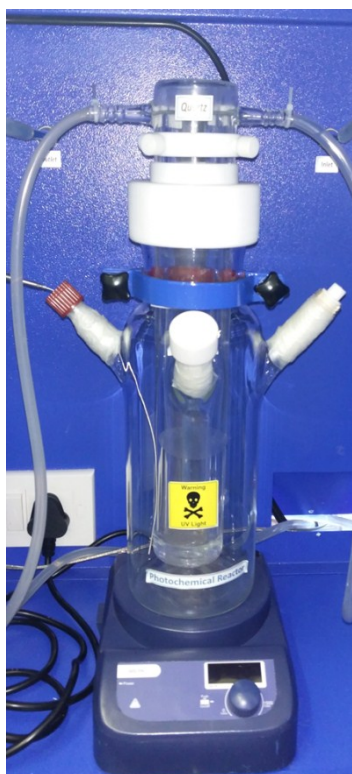

**Figure S3.** Picture of Lelesil Photocatalytic Reactor utilised in photocatalytic studies

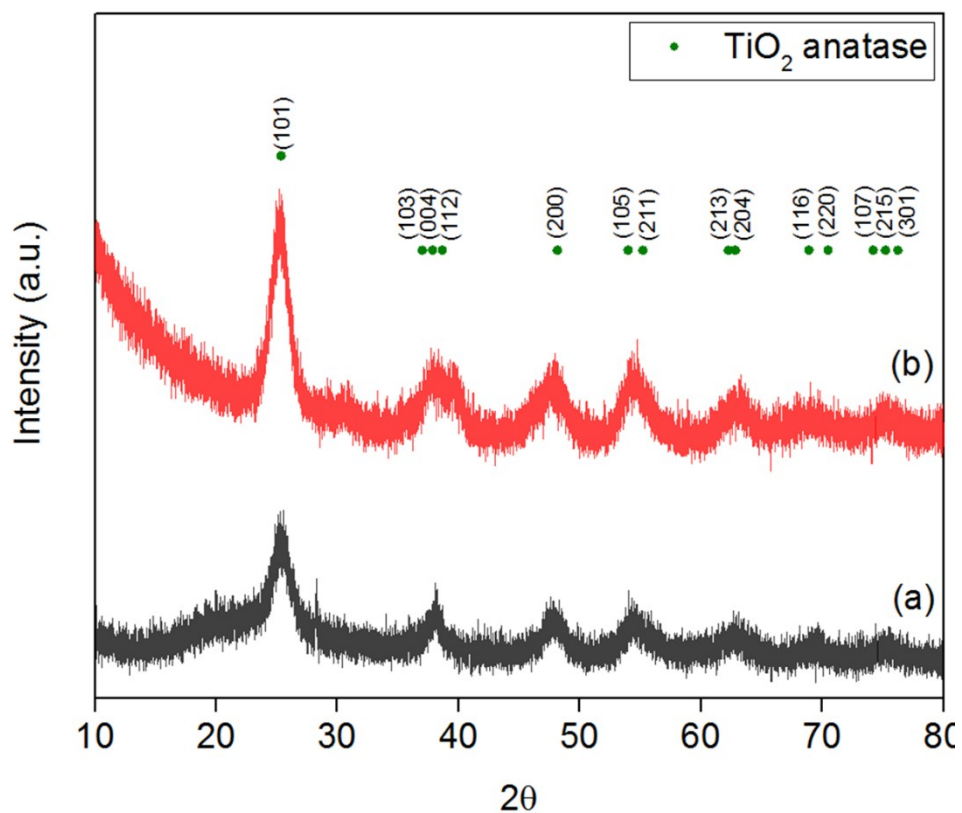

**Figure S4.** XRD pattern (a) before microwave synthesis of 3.97wt% Pd-TiO<sub>2</sub> powder and (b) after typical 3 minute microwave synthesis

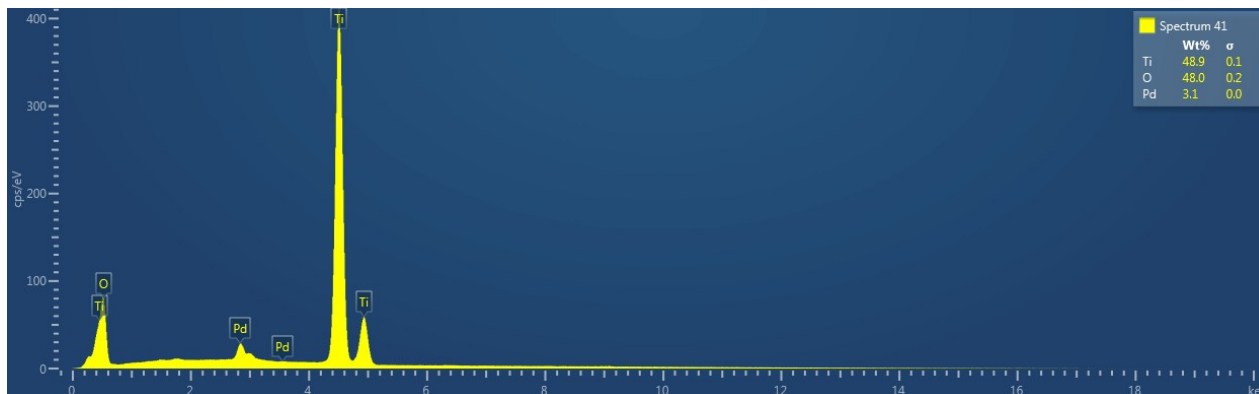

**Figure S5.** Typical EDX spectrum of a 3.97wt % Pd-TiO<sub>2</sub> powder

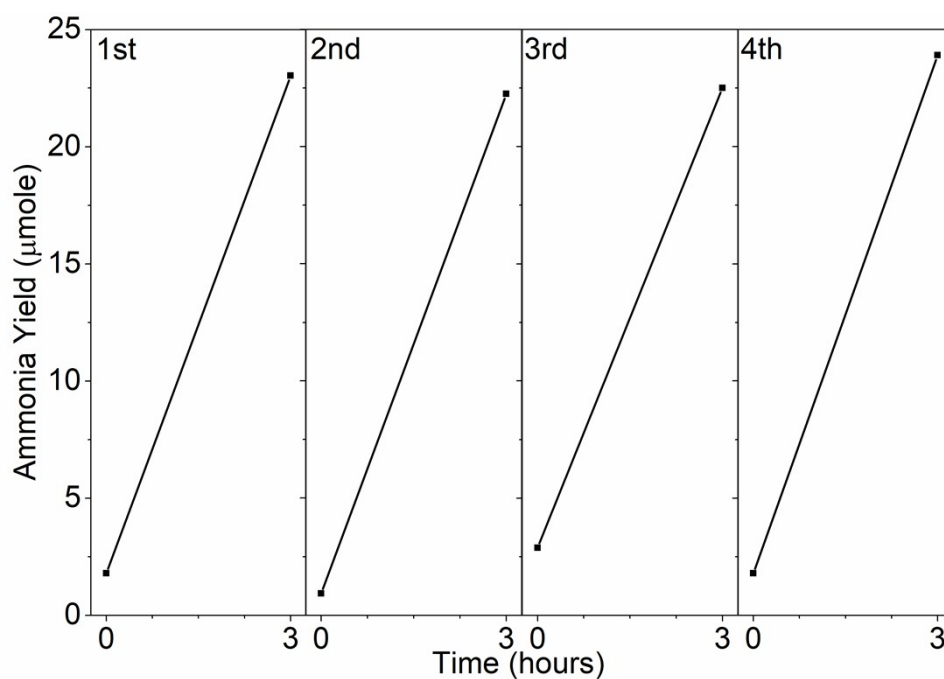

**Figure S6.** Yield of NH<sub>3</sub> over repeated 3 hour illuminated photocatalytic reactions, after each cycle photocatalyst powder was retrieved, washed and dried before the next reaction. Photocatalytic reaction conditions are

identical as stated in experimental section, however measurements were made before and after reaction instead of every 30 minutes.

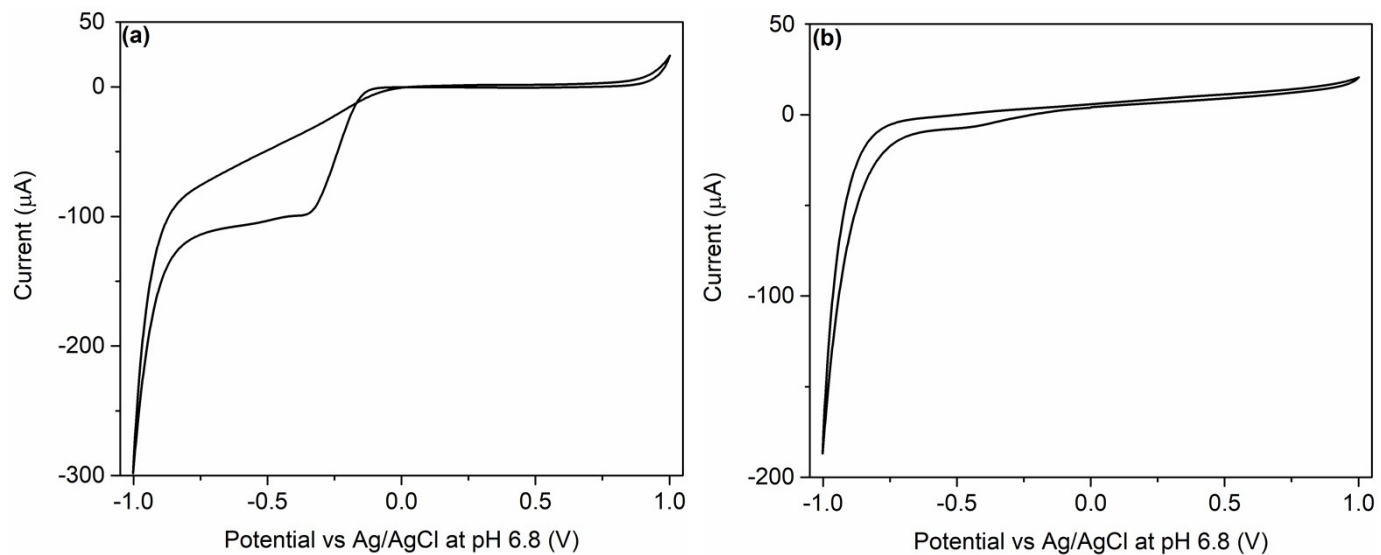

**Figure S7.** Cyclic voltammograms conducted in the dark on 3.97wt% Pd-TiO<sub>2</sub> photoelectrodes across a potential range of +1V to -1V vs Ag/AgCl 3M in 0.2M Na<sub>2</sub>SO<sub>4</sub> (pH 6.8) at a scan rate of 20mV/s in (a) Air, and (b) Argon atmospheres

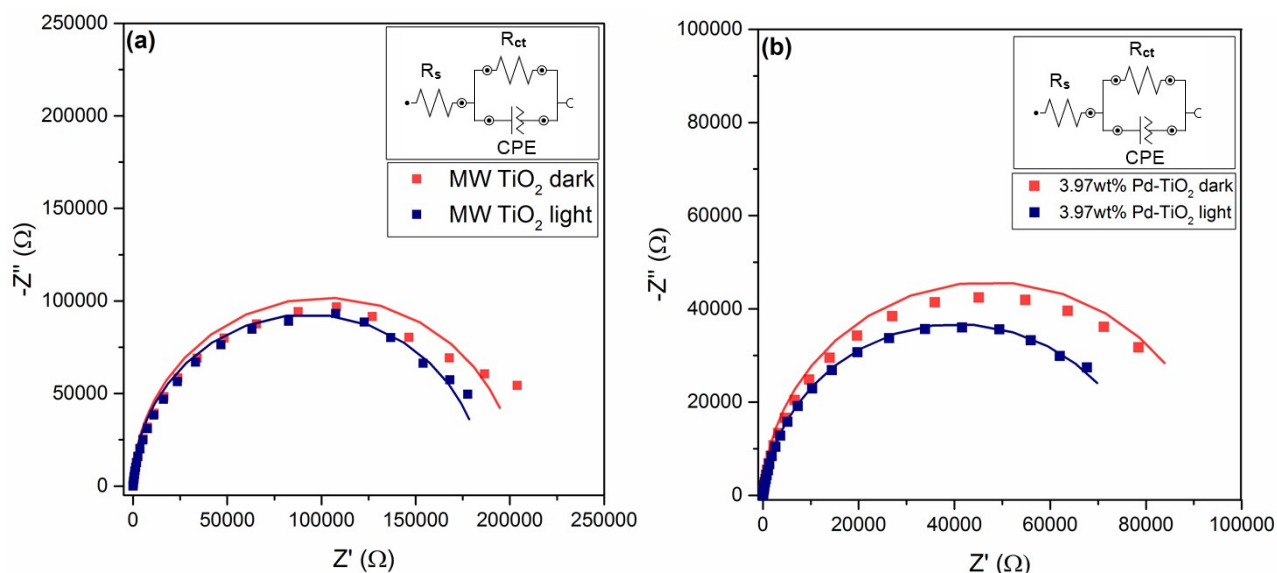

**Figure S8.** Nyquist plot comparisons between light and dark measurements of (a) MW-TiO<sub>2</sub> and (b) 3.97wt% Pd-TiO<sub>2</sub> photoelectrodes at 0.7V vs Ag/AgCl with a halogen lamp

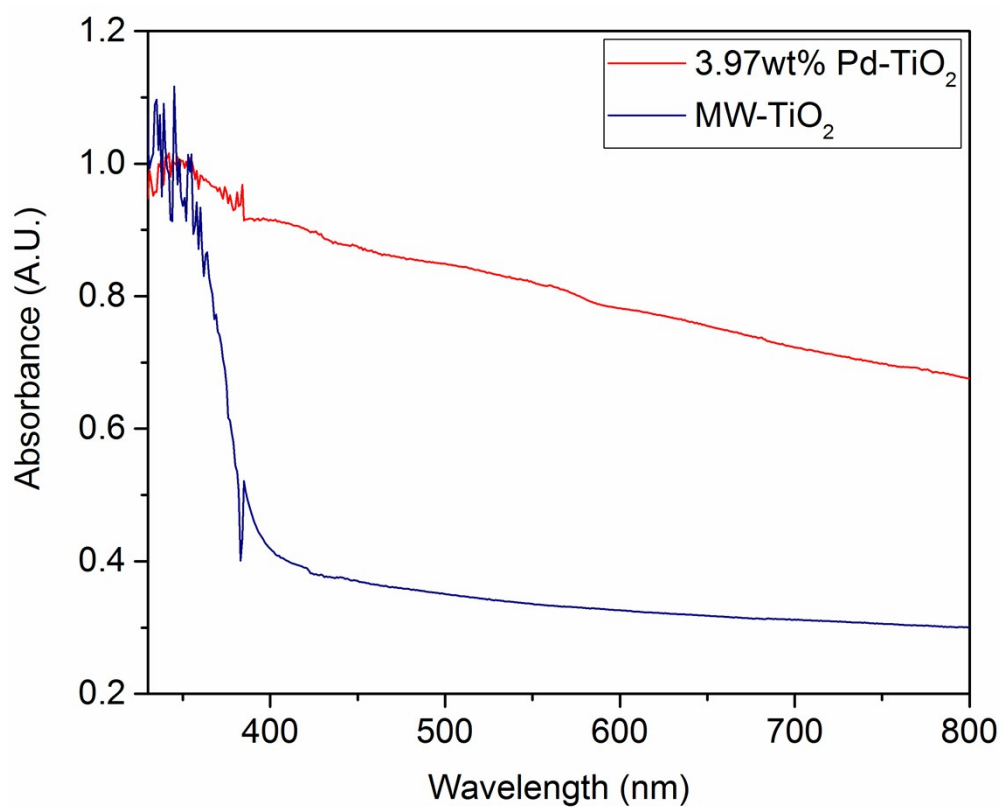

**Figure S9.** UV/Vis Absorbance spectrum for MW-TiO<sub>2</sub> and Pd-TiO<sub>2</sub> (instrumental noise is seen at lower wavelengths).
